# Supplementary material for: Multiple iodide autocatalysis paths of chemo-hydrodynamical patterns in the Briggs–Rauscher reaction
Source: Royal Society of Chemistry journal article supplement (doi:10.1039/d3cp00011g), 2023-01-01
Supplement: d3cp00011g1.pdf [file d3cp00011g1.pdf]

**Electronic Supplementary Information : Multiple iodide  
autocatalysis paths of chemo-hydrodynamical patterns in the  
Briggs-Rauscher Reaction**

LingYuan,<sup>‡,\*</sup> Hongzhang Wang,<sup>‡</sup> Chunxiao Meng, Zhenfang Cheng, Xiaoli Lv and Qingyu Gao\*  
*School of Chemical Engineering, China University of Mining and Technology, Xuzhou 221116 P R  
China*

Table of contents

|                           |   |
|---------------------------|---|
| 1. Fig. S1-S3.....        | 2 |
| 2. Video description..... | 3 |

1. Fig. S1-S3

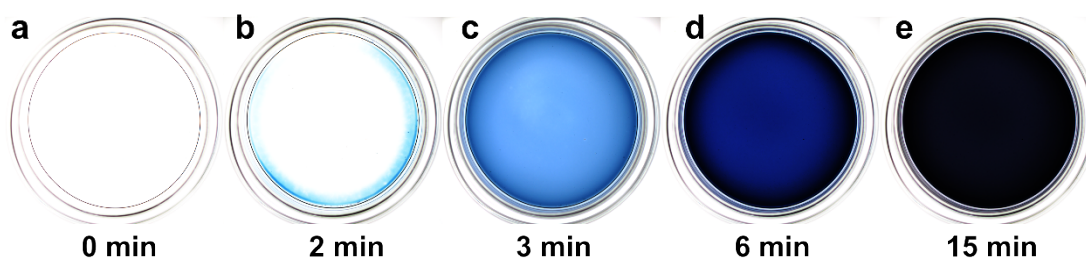

**Fig. S1** Evolution of spatiotemporal patterns in the BR reaction system with a cover. The initial conditions are the same as that in the Fig. 1.

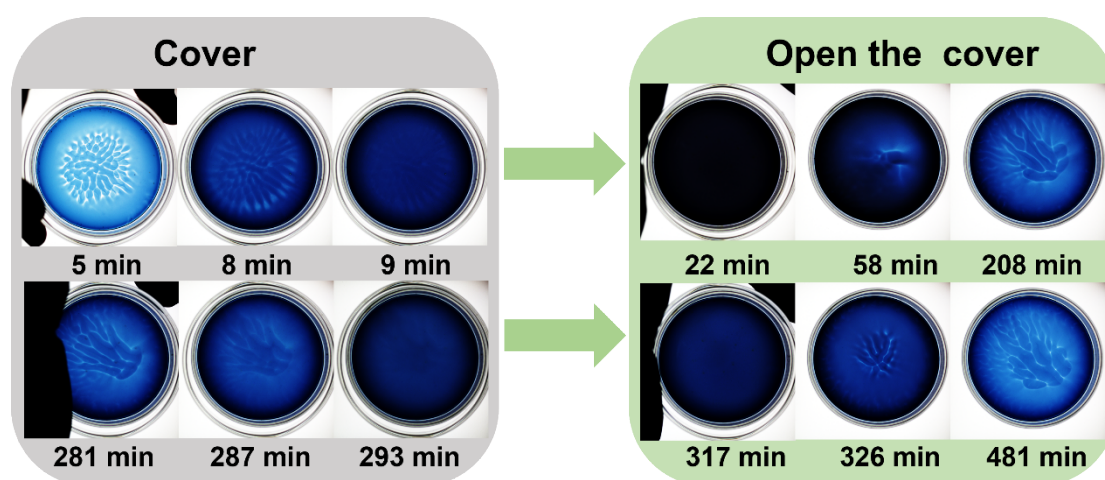

**Fig. S2** Evolution of spatiotemporal patterns in the BR reaction system when the Petri dish is covered and then the cover is removed. The initial conditions are the same as that in the Fig. 1.

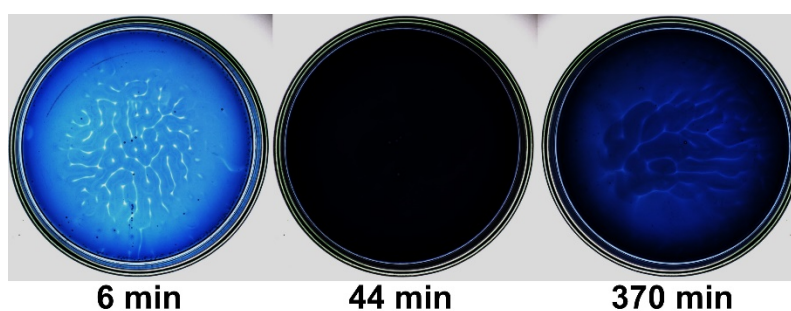

**Fig. S3** Evolution of spatiotemporal patterns at  $R = 0.1$  in the BR reaction system in the dark. Layer thickness is 3.0 mm,  $[H_2O_2]_0 = 1.12$  M,  $[KIO_3]_0 = 0.0234$  M,  $[H_2SO_4]_0 = 0.0313$  M,  $[CH_2(COOH)_2]_0 = 0.00234$  M,  $[Mn^{2+}]_0 = 0.8$  mM. The snapshots were taken at 6 min, 44 min, and 370 min with opening the LED background light.

## **2. Video description**

### **Video S1**

Evolution of spatiotemporal patterns with  $R = 0.15$  in the BR reaction system.

### **Video S2**

Evolution of spatiotemporal patterns in the BR reaction system with a cover.

### **Video S3**

Evolution of spatiotemporal patterns in the BR reaction system with different  $[\text{Mn}^{2+}]_0$ .

### **Video S4**

Evolution of spatiotemporal patterns with different  $R$  values in the BR reaction system.

### **Video S5**

Evolution of spatiotemporal patterns with different light intensities in the BR reaction system.

### **Video S6**

Evolution of spatiotemporal patterns in the  $\text{H}_2\text{O}_2 - \text{I}^-$  reaction system.

### **Video S7**

Evolution of spatiotemporal patterns in the BL reaction system.
